# Supplementary material for: Chlorogenic Acid Ameliorates Post‐Infectious Irritable Bowel Syndrome by Regulating Extracellular Vesicles of Gut Microbes
Source: Adv Sci (Weinh). 2023 Aug 24;10(28):2302798. doi: 10.1002/advs.202302798 (PMC10558682; doi:10.1002/advs.202302798)
Supplement: Supplementary file 1 — Supporting Information [file ADVS-10-2302798-s001.pdf]

## Supporting Information

for *Adv. Sci.*, DOI 10.1002/adv.202302798

Chlorogenic Acid Ameliorates Post-Infectious Irritable Bowel Syndrome by Regulating Extracellular Vesicles of Gut Microbes

*Cihua Zheng, Yuchun Zhong, Wenming Zhang, Zhuoya Wang, Haili Xiao, Wenjun Zhang, Jian Xie, Xiaogang Peng, Jun Luo\* and Wei Xu\**

## Supplementary materials

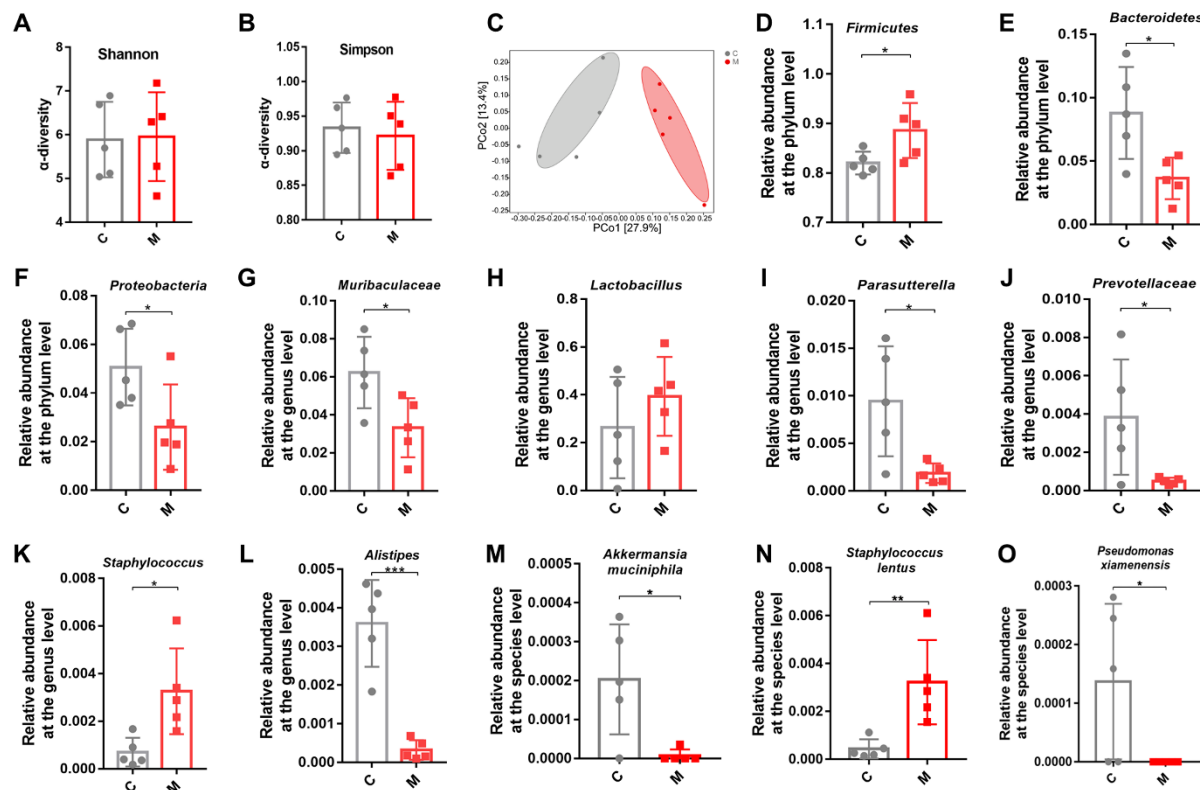

**Figure S1.** Composition of gut microbiota in rats with postirritable bowel syndrome. A) Shannon diversity. B) Simpson diversity. C) PCoA to estimate the  $\beta$ -diversity index (n=5). D) *Firmicutes*. E) *Bacteroidetes*. F) *Proteobacteria*. G) *Muribaculaceae*. H) *Lactobacillus*. I) *Parasutterella*. J) *Prevotellaceae*. K) *Staphylococcus*. L) *Alistipes*. M) *Akkermansia muciniphila*. N) *Staphylococcus lentus*. O) *Pseudomonas xiamenensis*. C, control group; M, PI-IBS rat group. Data are presented as the mean  $\pm$  SD. \*  $P < 0.05$ ; \*\*  $P < 0.01$ ; \*\*\*,  $P < 0.001$ .

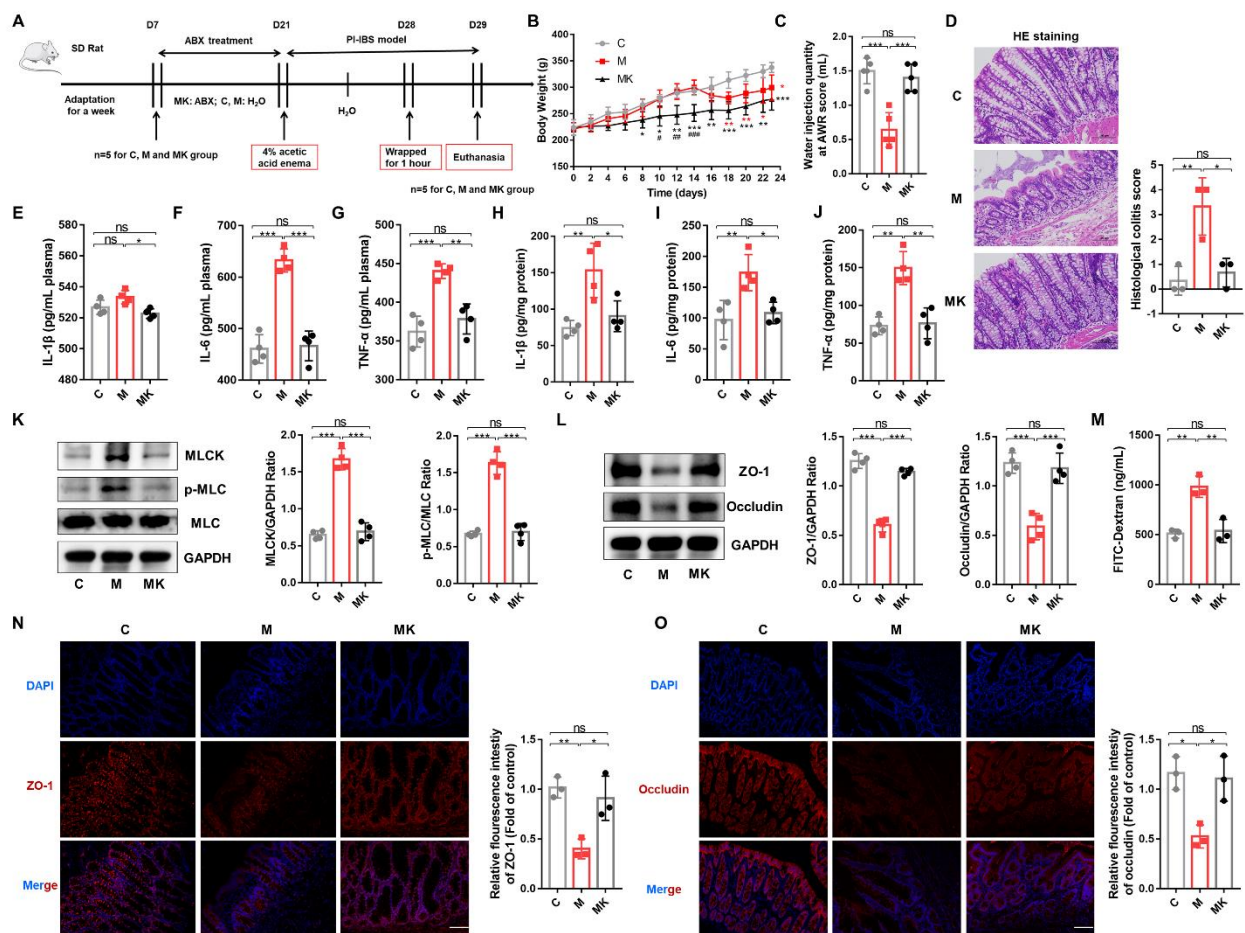

**Figure S2.** The gut microbiota was involved in the occurrence of PI-IBS. A) Schematic diagram of the effect of ABC on the PI-IBS model in rats (n=5). B) ABC reduced the weight of rats (n=5). C) Water injection quantity at an AWR score of 3 (n=5). D) H&E staining and pathological score of colon sections (n=3). E-J) Concentrations of the representative proinflammatory cytokines IL-1 $\beta$ , IL-6 and TNF- $\alpha$  in rat serum and colon tissue (n=4). K) Expression of key proteins of the MLCK/p-MLC signaling pathway in rat colon tissue (n=4). L) The expression of tight junction proteins (ZO-1, Occludin) in rat colon tissue (n=4). M) Measurement of gut permeability in rats (n=3). N, O) Immunofluorescence staining of tight junction protein (ZO-1, Occludin) expression in the colonic section (n=3). C, control group; M, PI-IBS rat group. Scale bar, 100  $\mu$ m. Data are presented as the mean  $\pm$  SD. ns, P > 0.05; \* P < 0.05; \*\* P < 0.01; \*\*\*, P < 0.001. AA: Acetic acid; PI-IBS: Post-infectious irritable bowel syndrome; AWR: Abdominal withdrawal reflex; ABC: antibiotic cocktail.

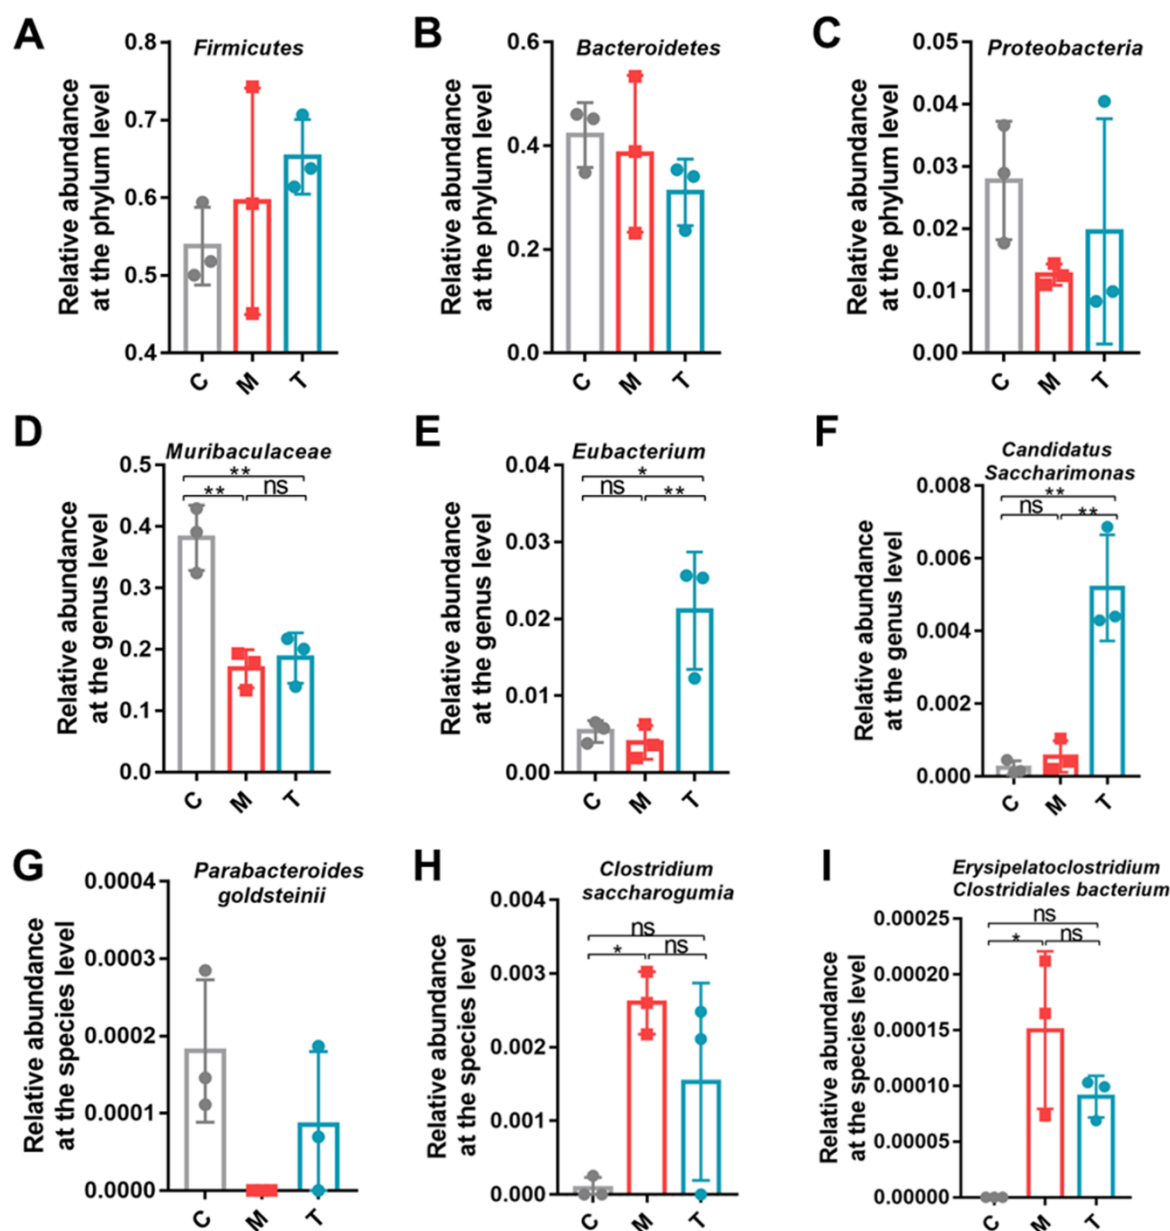

**Figure S3.** Effect of rectal administration of CGA on gut microbiota composition in rats. A) *Firmicutes*. B) *Bacteroidetes*. C) *Proteobacteria*. D) *Muribaculaceae*. E) *Eubacterium*. F) *Candidatus Saccharimonas*. G) *Parabacteroides goldsteinii*. H) *Clostridium saccharogumia*. I) *Erysipelatoclostridium Clostridiales bacterium*. (n=3). C, control group; M, PI-IBS rat group; T, PI-IBS rats rectally administered CGA group. Data are presented as the mean  $\pm$  SD. ns,  $P > 0.05$ ; \*  $P < 0.05$ ; \*\*  $P < 0.01$ . CGA: chlorogenic acid.

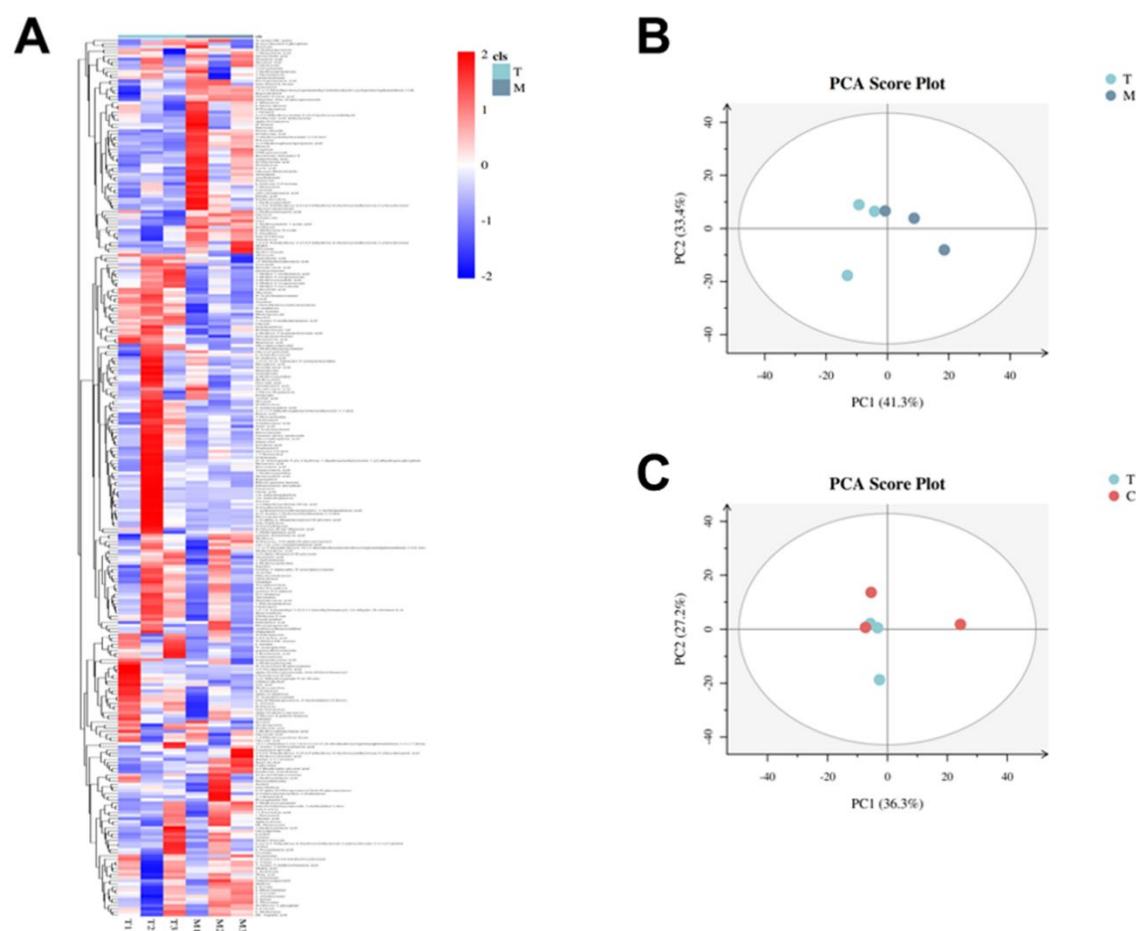

**Figure S4.** Effect of rectal administration of CGA on the composition of fecal metabolites in rats. A) The 282 metabolites analyzed were represented by a thermogram. B) Principal component analysis of metabolic data between the T and M groups. C) Principal component analysis of metabolic data between the T and C groups. The red dot represents the sample of the control group, the green dot represents the sample of the CGA treatment group, and the blue dot represents the sample of the model group. (n=3). C, control group; M, PI-IBS rat group; T, PI-IBS rats rectally administered CGA group. CGA: chlorogenic acid.

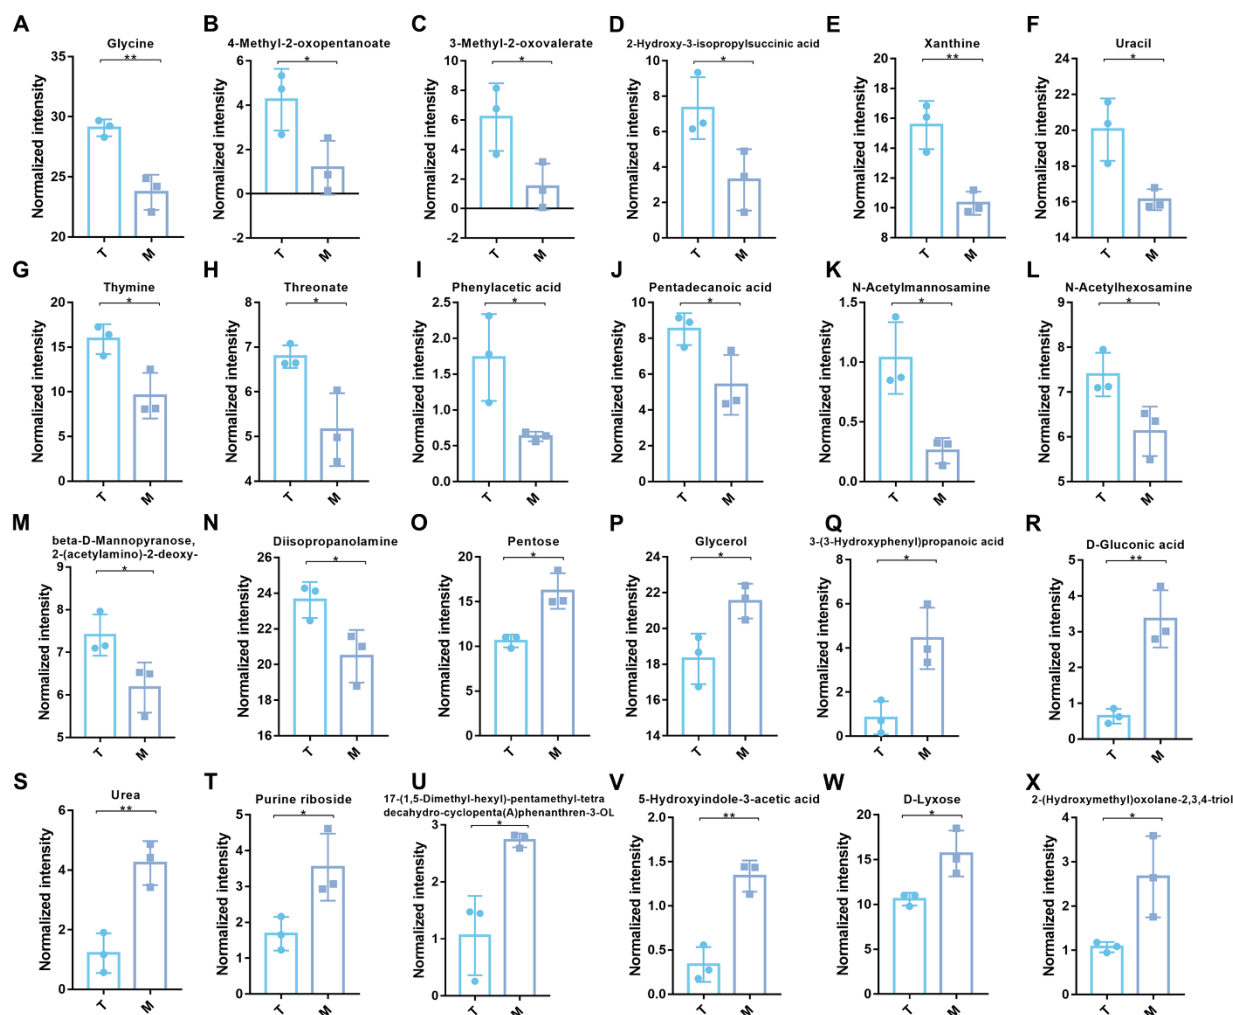

**Figure S5.** The levels of 24 metabolites changed significantly after CGA treatment of PI-IBS. Among these metabolites, the former 14 metabolites significantly increased and the latter 10 metabolites obviously decreased after treatment. The ordinate represents the peak area, the green bar represents the CGA treatment group sample, and the blue bar represents the PI-IBS group sample. (n=3). M, PI-IBS rat group; T, PI-IBS rats rectally administered CGA group. Data are presented as the mean  $\pm$  SD. \*  $P < 0.05$ ; \*\*  $P < 0.01$ . CGA: chlorogenic acid.

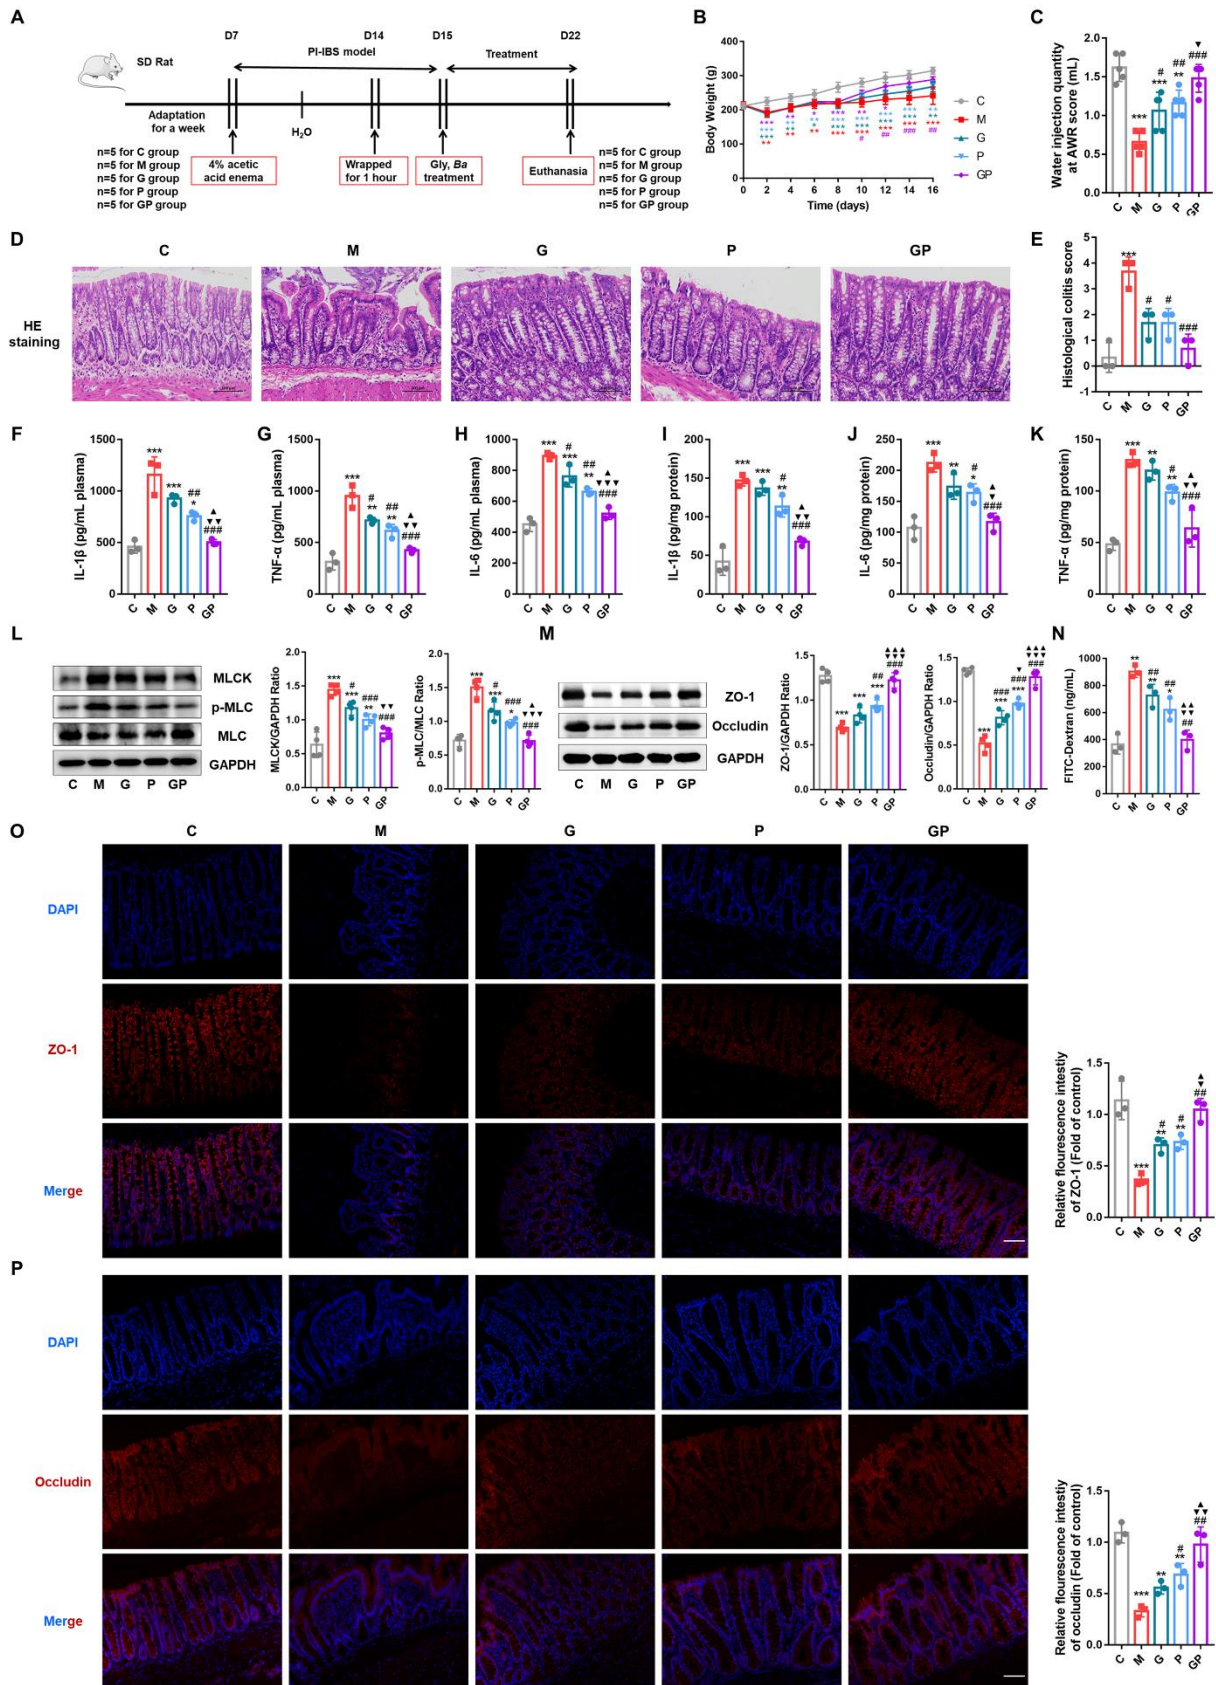

**Figure S6.** Concomitant use of *B. acidifaciens* and glycine relieved symptoms of PI-IBS in rats  
A) Schematic diagram of PI-IBS rats administered *B. acidifaciens* and glycine. B) Changes in body weight (n=5). C) Water injection quantity at an AWR score of 3 (n=5). D, E) H&E staining

and pathological score of colon sections (n=3). F-K) Concentrations of the representative proinflammatory cytokines IL-1 $\beta$ , IL-6 and TNF- $\alpha$  in rat serum and colon tissue (n=3). L) Expression of key proteins of the MLCK/p-MLC signaling pathway in rat colon tissue (n=4). (M) The expression of tight junction proteins (ZO-1, Occludin) in rat colon tissue (n=3-4). N) Measurement of gut permeability in rats (n=3). O, P) Immunofluorescence staining of tight junction protein (ZO-1, Occludin) expression in the colonic section (n=3). C, control group; M, PI-IBS rat group; G, free drinking 0.5% glycine water group; P,  $1 \times 10^9$  CFU *B. acidifaciens* rectal administration group; GP, glycine and *B. acidifaciens* combination treatment group. Scale bar, 100  $\mu$ m. Data are presented as the mean  $\pm$  SD. \*  $P < 0.05$  versus C group, #  $P < 0.05$  versus M group, ▼  $P < 0.05$  versus G group, ▲  $P < 0.05$  versus P group. ns,  $P > 0.05$ ; \*/#/#/▲  $P < 0.05$ ; \*\*/##/▼▼/▲▲  $P < 0.01$ ; \*\*\*/###/▼▼▼/▲▲▲  $P < 0.001$ . The expression of tight junction proteins (ZO-1, Occludin) in rat colon tissue (n=4).

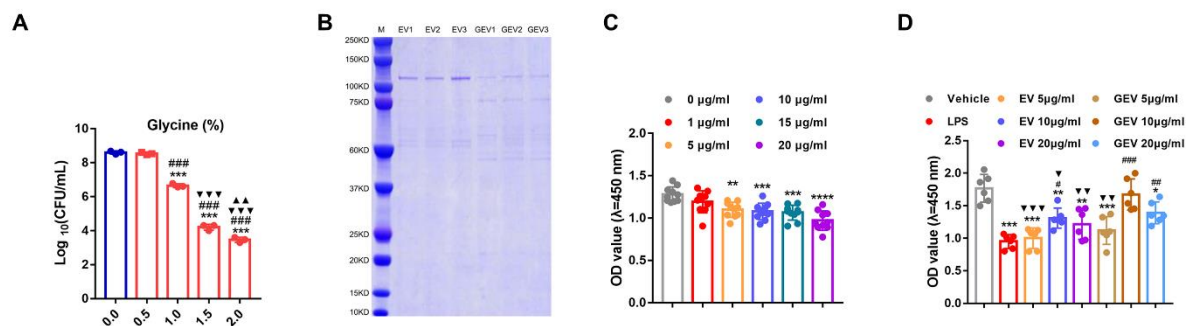

**Figure S7:** A) Viability of *B. acidifaciens* treated with glycine at various concentrations (0%, 0.5%, 1%, 1.5%, and 2%). B) EV and GEV protein profiles. C, D) EV treatment reversed LPS-induced cytotoxicity of Caco-2 cells as measured by Cell Counting Kit-8 assay. (n=10; n=6). Data are presented as the mean  $\pm$  SD. \*  $P < 0.05$  versus 0% or vehicle group, #  $P < 0.05$  versus 0.5% or LPS group, ▼  $P < 0.05$  versus 1.0% or GEV 10  $\mu\text{g/mL}$  group, ▲  $P < 0.05$  versus 1.5%. ns,  $P > 0.05$ ; \*/#/#/▼  $P < 0.05$ ; \*\*/##/▼▼  $P < 0.01$ ; \*\*\*/###/▼▼▼  $P < 0.001$ ; \*\*\*\*,  $P < 0.0001$ . EV: without induced *B. acidifaciens* extracellular vesicles; GEV: glycine-induced *B. acidifaciens* extracellular vesicles.

**A**

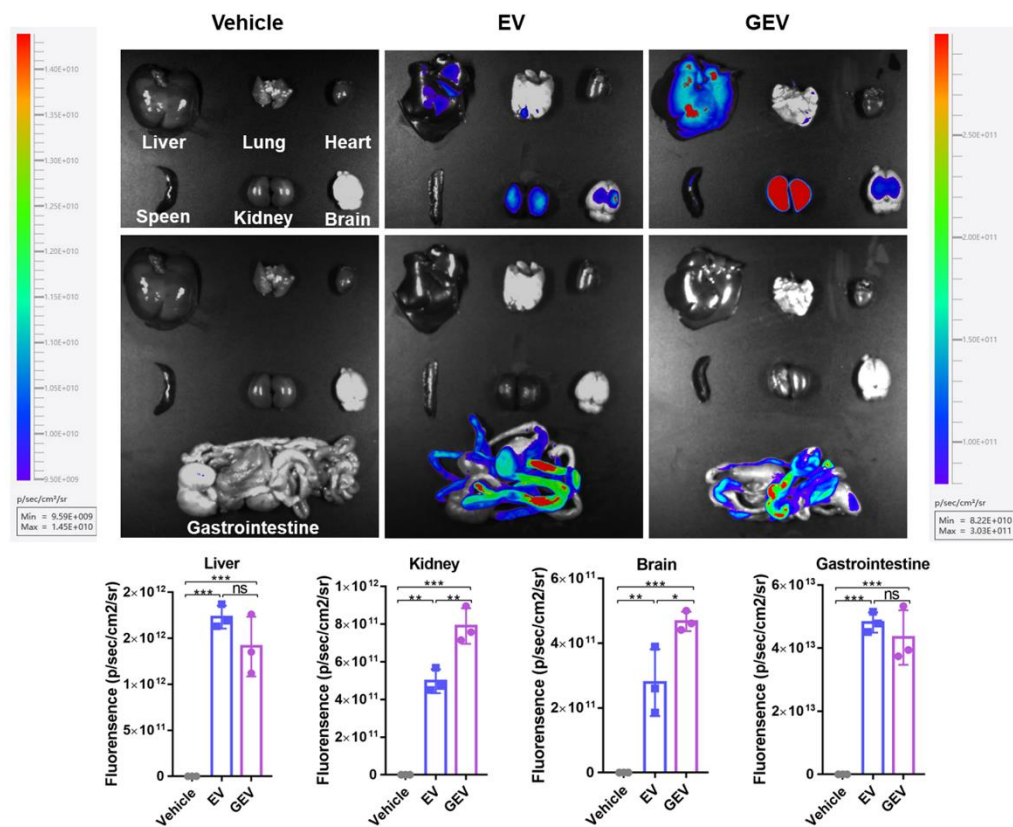

**B**

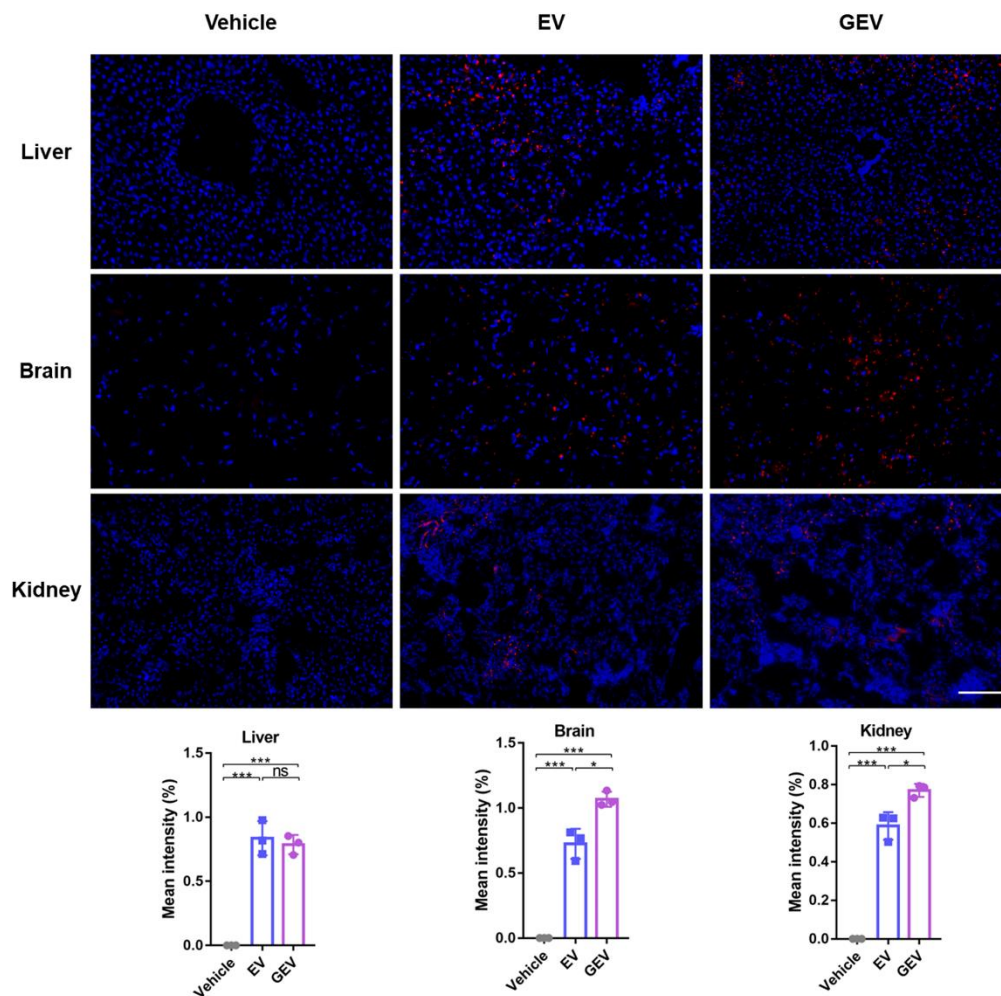

**Figure S8.** Biodistribution of EVs in rats. A) EV *in vivo* fluorescence imaging of rat lung, kidney, heart, spleen, brain, liver, and gastrointestinal tract treated with vehicle or Dil-labeled EVs (EV and GEV) for 3 hours and quantification of the fluorescent signals (n=3). B) Fluorescence microscopy analysis of kidney, brain and liver sections from rats treated with PKH26-labeled EVs for 3 hours by rectal administration and quantification of the fluorescent signals (n=3). Scale bar, 100  $\mu$ m. Data are presented as the mean  $\pm$  SD. ns,  $P > 0.05$ ; \*  $P < 0.05$ ; \*\*  $P < 0.01$ ; \*\*\*,  $P < 0.001$ . EV: without induced *B. acidifaciens* extracellular vesicles; GEV: glycine-induced *B. acidifaciens* extracellular vesicles.

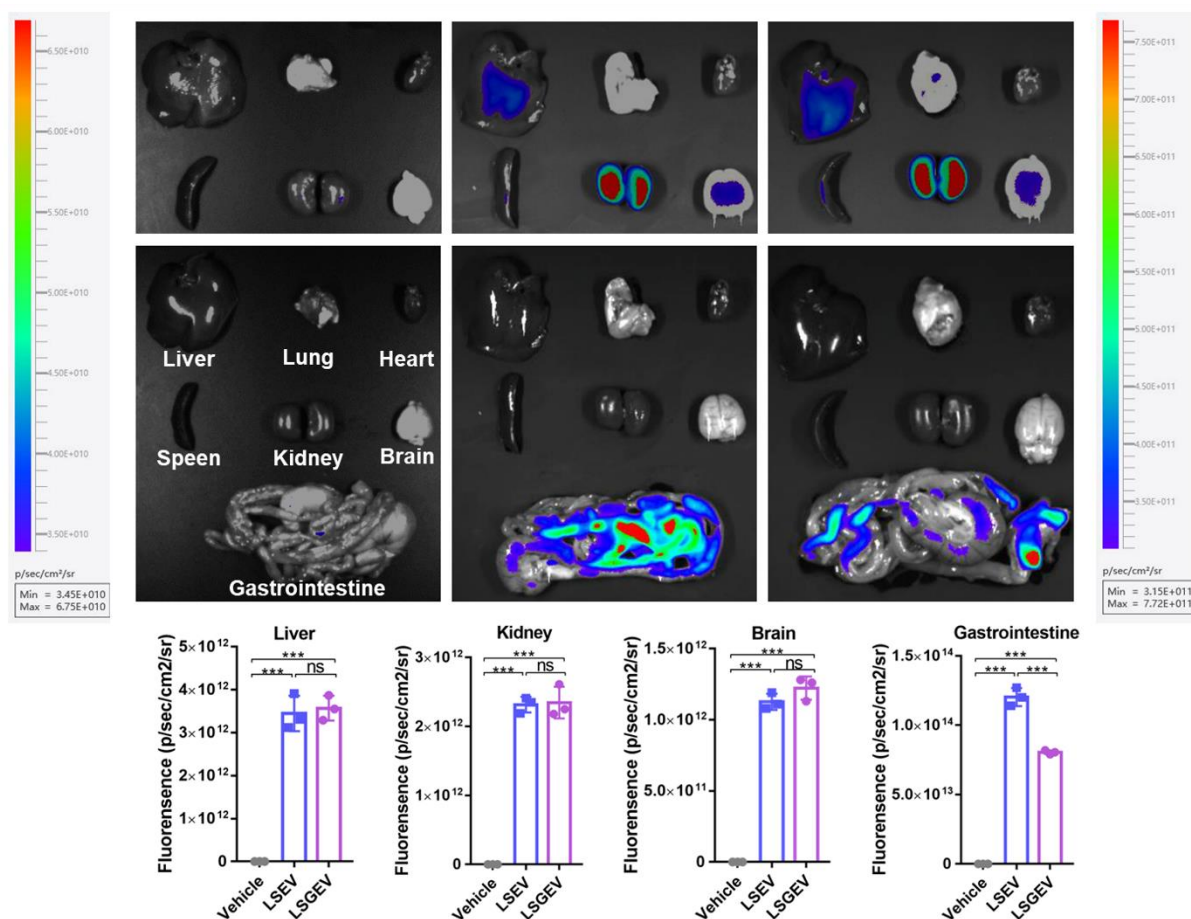

**Figure S9.** Biodistribution of *Lactobacillus salivarius* EVs in rats. *L. salivarius* EV *in vivo* fluorescence imaging of rat lung, kidney, heart, spleen, brain, liver, and gastrointestinal tract treated with vehicle or Dil-labeled *L. salivarius* EVs (LSEV and LSGEV) for 3 hours and quantification of the fluorescent signals (n=3). Data are presented as the mean  $\pm$  SD. ns,  $P > 0.05$ ; \*\*\*,  $P < 0.001$ . LSEV: without induced *L. salivarius* extracellular vesicles; LSGEV: 0.5% glycine-induced *L. salivarius* extracellular vesicles.

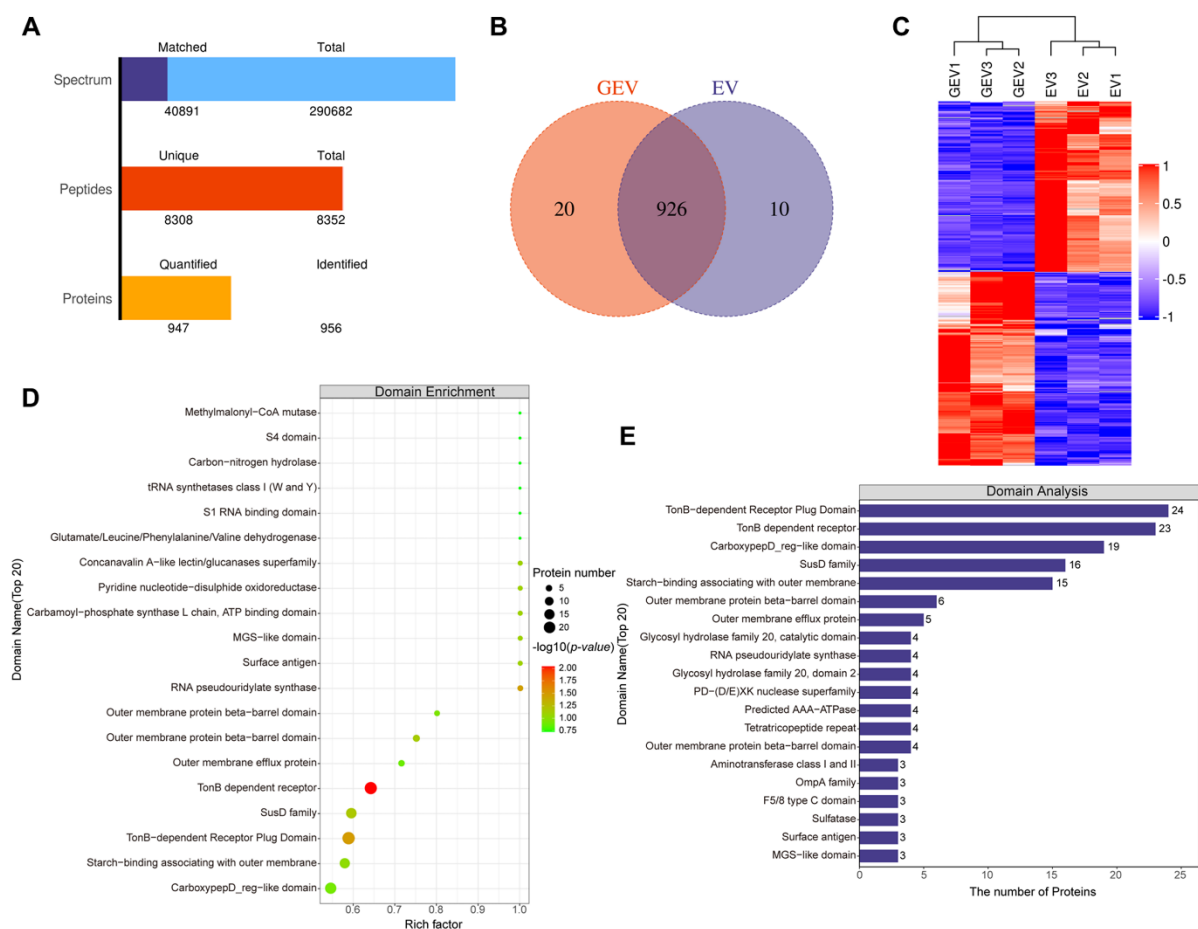

**Figure S10.** Proteomic analysis of GEV and EV. A) Summary of tandem mass spectrometry (MS/MS) database search results for GEV and EV. B) Scalar-Venn representation. C) Protein cluster analysis of differential expression between GEV and EV. Each column represents a group of samples, and each row represents a protein. The expression of sexually different proteins in different samples was standardized by the Z Score method and displayed in a heatmap in different colors, in which red represents proteins with a significant increase, blue represents proteins with a significant decrease, and gray represents proteins with no quantitative information. D) Plots of enrichment analysis of GEV and EV domains. The abscissa in the figure represents the enrichment factor (rich factor  $\leq 1$ ). The vertical axis represents the statistical results of differential proteins under each domain classification. Bubble colors indicate the importance of rich domain classification.  $P$  values were calculated according to Fisher's exact test, and the color gradient indicates the magnitude of the  $P$  value. The closer the color is to red, the smaller the  $P$  value, and the higher the significance level of enrichment under the corresponding domain classification. E) Domain analysis of differentially expressed proteins in GEV and EV. The number of the top 20 proteins in the domain is displayed as a histogram. (n=3). EVs: extracellular vesicles; EV: without induced *B. acidifaciens* extracellular vesicles; GEV: glycine-induced *B. acidifaciens* extracellular vesicles.

**Supplementary Table 1 Top 24 metabolites in fecal samples from normal control (C group) or PI-IBS rats (M group).**

| Metabolites                                                                      | VIP-value   | <i>P</i> -value |
|----------------------------------------------------------------------------------|-------------|-----------------|
| 5-Hydroxyindole-3-acetic acid                                                    | 1.185603746 | 0.002806557     |
| D-Gluconic acid                                                                  | 1.940911626 | 0.004610574     |
| Glycine                                                                          | 2.723823414 | 0.004629623     |
| Urea                                                                             | 2.0361113   | 0.006242666     |
| Xanthine                                                                         | 2.674386508 | 0.007178098     |
| Pentose                                                                          | 2.742432452 | 0.010139166     |
| N-Acetylmannosamine                                                              | 1.014587074 | 0.013479445     |
| 17-(1,5-Dimethyl-hexyl)-pentamethyl-tetradecahydro-cyclopenta(A)phenanthren-3-OL | 1.484142339 | 0.014893969     |
| 3-(3-Hydroxyphenyl) propanoic acid                                               | 2.171669328 | 0.016777492     |
| Uracil                                                                           | 2.246513727 | 0.021080723     |
| Thymine                                                                          | 2.847779096 | 0.022984309     |
| Threonate                                                                        | 1.434369241 | 0.029294302     |
| D-Lyxose                                                                         | 2.528131224 | 0.02940553      |
| Glycerol                                                                         | 2.007253247 | 0.031131913     |
| Phenylacetic acid                                                                | 1.167782868 | 0.035187434     |
| Purine riboside                                                                  | 1.51195004  | 0.036964422     |
| Diisopropanolamine                                                               | 1.97001242  | 0.037560594     |
| N-Acetylhexosamine                                                               | 1.244244937 | 0.040344592     |
| 2-(Hydroxymethyl) oxolane-2,3,4-triol                                            | 1.392309466 | 0.040796833     |
| 3-Methyl-2-oxovalerate                                                           | 2.388649173 | 0.042471219     |
| 4-Methyl-2-oxopentanoate                                                         | 1.922228687 | 0.045444627     |
| Pentadecanoic acid                                                               | 1.934954653 | 0.046273047     |
| 2-Hydroxy-3-isopropylsuccinic acid                                               | 2.207127272 | 0.046447917     |
| beta-D-Mannopyranose, 2-(acetylamino)-2-deoxy-                                   | 1.213310773 | 0.048821614     |

*P*-values were determined using a two-sided, Fisher's exact test with Benjamini-Hochberg multiple-testing correction

**Supplementary Table 2. The main metabolic pathways analysis.**

| Pathway                                     | Raw p    | -log(p) | Impact   |
|---------------------------------------------|----------|---------|----------|
| Pyrimidine metabolism                       | 0.010854 | 4.5232  | 0.076506 |
| Valine, leucine and isoleucine biosynthesis | 0.011585 | 4.458   | 0.12903  |
| Purine metabolism                           | 0.029845 | 3.5118  | 0.039711 |
| Valine, leucine and isoleucine degradation  | 0.03627  | 3.3168  | 0.11858  |
| Pentose and glucuronate interconversions    | 0.061028 | 2.7964  | 0.017241 |
| Phenylalanine metabolism                    | 0.068933 | 2.6746  | 0.035714 |
| ABC transporters                            | 0.075474 | 2.584   | 0.021739 |
| Synaptic vesicle cycle                      | 0.083634 | 2.4813  | 0.083333 |
| Regulation of lipolysis in adipocytes       | 0.096904 | 2.334   | 0.14286  |
| Retrograde endocannabinoid signaling        | 0.12928  | 2.0458  | 0.052632 |
| Caffeine metabolism                         | 0.14817  | 1.9094  | 0.029412 |
| Arginine biosynthesis                       | 0.15438  | 1.8684  | 0.018868 |
| Thermogenesis                               | 0.15438  | 1.8684  | 0.10256  |
| Biotin metabolism                           | 0.18477  | 1.6886  | 0.015625 |
| Mineral absorption                          | 0.19073  | 1.6569  | 0.028571 |
| Pantothenate and CoA biosynthesis           | 0.19664  | 1.6264  | 0.026786 |
| Thiamine metabolism                         | 0.20251  | 1.597   | 0.022222 |
| beta-Alanine metabolism                     | 0.20833  | 1.5686  | 0.025862 |
| Pentose phosphate pathway                   | 0.22557  | 1.4891  | 0.041026 |
| Central carbon metabolism in cancer         | 0.23687  | 1.4403  | 0.018868 |
| Glutathione metabolism                      | 0.24245  | 1.4169  | 0.048951 |
| Glycerolipid metabolism                     | 0.24245  | 1.4169  | 0.12987  |
| Serotonergic synapse                        | 0.26441  | 1.3302  | 0.016129 |
| Galactose metabolism                        | 0.28576  | 1.2526  | 0.015873 |
| Protein digestion and absorption            | 0.29101  | 1.2344  | 0.021277 |
| Primary bile acid biosynthesis              | 0.29101  | 1.2344  | 0.04878  |
| Lysine degradation                          | 0.30652  | 1.1825  | 0.006493 |
| Ascorbate and aldarate metabolism           | 0.30652  | 1.1825  | 0.006493 |
| Glycine, serine and threonine metabolism    | 0.30652  | 1.1825  | 0.096273 |
| Aminoacyl-tRNA biosynthesis                 | 0.31668  | 1.1499  | 0.017857 |
| Neuroactive ligand-receptor interaction     | 0.31668  | 1.1499  | 0.019231 |
| Phosphonate and phosphinate metabolism      | 0.33657  | 1.089   | 0.014706 |
| Glyoxylate and dicarboxylate metabolism     | 0.36537  | 1.0068  | 0.10769  |
| Arginine and proline metabolism             | 0.43643  | 0.82912 | 0.068627 |
| Tryptophan metabolism                       | 0.45703  | 0.783   | 0.042296 |
| Amino sugar and nucleotide sugar metabolism | 0.54965  | 0.59847 | 0.065517 |
| Porphyrin and chlorophyll metabolism        | 0.65162  | 0.42829 | 0.019608 |
